# Supplementary material
Source: PubMed Central journal article supplement (PMC11128274)
Supplement: NIHMS1989549-supplement-Appendix_A.pdf [file NIHMS1989549-supplement-Appendix_A.pdf]

## Appendix A. Top 15 Disease Categories and Associated ICD-9 Codes

| Disease Category                              | ICD-9 Code | Corresponding Diagnosis                                                                                                                                 |
|-----------------------------------------------|------------|---------------------------------------------------------------------------------------------------------------------------------------------------------|
| Acute Myocardial Infarction                   | 410        | Acute myocardial infarction                                                                                                                             |
| Congestive Heart Failure                      | 39891      | Rheumatic heart failure (congestive)                                                                                                                    |
|                                               | 428        | Heart Failure                                                                                                                                           |
| Hypertensive heart disease                    | 40201      | Malignant hypertensive heart disease with heart failure                                                                                                 |
|                                               | 40211      | Benign hypertensive heart disease with heart failure                                                                                                    |
|                                               | 40291      | Unspecified hypertensive heart disease with heart failure                                                                                               |
| Hypertensive heart and chronic kidney disease | 40401      | Hypertensive heart and chronic kidney disease, malignant, with heart failure and with chronic kidney disease stage I through stage IV, or unspecified   |
|                                               | 40403      | Hypertensive heart and chronic kidney disease, malignant, with heart failure and with chronic kidney disease stage V or end stage renal disease         |
|                                               | 40411      | Hypertensive heart and chronic kidney disease, benign, with heart failure and with chronic kidney disease stage I through stage IV, or unspecified      |
|                                               | 40413      | Hypertensive heart and chronic kidney disease, benign, with heart failure and chronic kidney disease stage V or end stage renal disease                 |
|                                               | 40491      | Hypertensive heart and chronic kidney disease, unspecified, with heart failure and with chronic kidney disease stage I through stage IV, or unspecified |
|                                               | 40493      | Hypertensive heart and chronic kidney disease, unspecified, with heart failure and chronic kidney disease stage V or end stage renal disease            |
| Pneumonia                                     | 480        | Viral pneumonia                                                                                                                                         |
|                                               | 481        | Pneumococcal pneumonia                                                                                                                                  |
|                                               | 482        | Other bacterial pneumonia                                                                                                                               |
|                                               | 483        | Pneumonia due to other specified organism                                                                                                               |
|                                               | 484        | Pneumonia in infectious diseases classified elsewhere                                                                                                   |
|                                               | 485        | Bronchopneumonia, organism unspecified                                                                                                                  |
|                                               | 486        | Pneumonia, organism unspecified                                                                                                                         |
| Stroke                                        | 430        | Subarachnoid hemorrhage                                                                                                                                 |
|                                               | 431        | Intracerebral hemorrhage                                                                                                                                |
|                                               | 4320       | Nontraumatic extradural hemorrhage                                                                                                                      |
|                                               | 4321       | Subdural hemorrhage                                                                                                                                     |
|                                               | 4329       | Unspecified intracranial hemorrhage                                                                                                                     |
|                                               | 43301      | Occlusion and stenosis of basilar artery with cerebral infarction                                                                                       |
|                                               | 43311      | Occlusion and stenosis of carotid artery with cerebral infarction                                                                                       |

|             |       |                                                                                                                                                                                  |
|-------------|-------|----------------------------------------------------------------------------------------------------------------------------------------------------------------------------------|
|             | 43321 | Occlusion and stenosis of vertebral artery with cerebral infarction                                                                                                              |
|             | 43331 | Occlusion and stenosis of multiple and bilateral precerebral arteries with cerebral infarction                                                                                   |
|             | 43381 | Occlusion and stenosis of other specified precerebral artery with cerebral infarction                                                                                            |
|             | 43391 | Occlusion and stenosis of unspecified precerebral artery with cerebral infarction                                                                                                |
|             | 43401 | Cerebral thrombosis with cerebral infarction                                                                                                                                     |
|             | 43411 | Cerebral embolism with cerebral infarction                                                                                                                                       |
|             | 43491 | Cerebral artery occlusion, unspecified with cerebral infarction                                                                                                                  |
| Respiratory | 00322 | Salmonella pneumonia                                                                                                                                                             |
|             | 01004 | Primary tuberculous infection, tubercle bacilli not found (in sputum) by microscopy, but found by bacterial culture                                                              |
|             | 01010 | Tuberculous pleurisy in primary progressive tuberculosis, unspecified                                                                                                            |
|             | 01084 | Other primary progressive tuberculosis, tubercle bacilli not found (in sputum) by microscopy, but found by bacterial culture                                                     |
|             | 01090 | Primary tuberculous infection, unspecified, unspecified                                                                                                                          |
|             | 01100 | Tuberculosis of lung, infiltrative, unspecified                                                                                                                                  |
|             | 01103 | Tuberculosis of lung, infiltrative, tubercle bacilli found (in sputum) by microscopy                                                                                             |
|             | 01104 | Tuberculosis of lung, infiltrative, tubercle bacilli not found (in sputum) by microscopy, but found by bacterial culture                                                         |
|             | 01106 | Tuberculosis of lung, infiltrative, tubercle bacilli not found bacteriological or histological examination, but tuberculosis confirmed by other methods [inoculation of animals] |
|             | 01110 | Tuberculosis of lung, nodular, unspecified                                                                                                                                       |
|             | 01114 | Tuberculosis of lung, nodular, tubercle bacilli not found (in sputum) by microscopy, but found by bacterial culture                                                              |
|             | 01116 | Tuberculosis of lung, nodular, tubercle bacilli not found by bacteriological or histological examination, but tuberculosis confirmed by other methods [inoculation of animals]   |
|             | 01120 | Tuberculosis of lung with cavitation, unspecified                                                                                                                                |
|             | 01121 | Tuberculosis of lung with cavitation, bacteriological or histological examination not done                                                                                       |
|             | 01122 | Tuberculosis of lung with cavitation, bacteriological or histological examination unknown (at present)                                                                           |

|  |       |                                                                                                                                                                                       |
|--|-------|---------------------------------------------------------------------------------------------------------------------------------------------------------------------------------------|
|  | 01123 | Tuberculosis of lung with cavitation, tubercle bacilli found (in sputum) by microscopy                                                                                                |
|  | 01124 | Tuberculosis of lung with cavitation, tubercle bacilli not found (in sputum) by microscopy, but found by bacterial culture                                                            |
|  | 01125 | Tuberculosis of lung with cavitation, tubercle bacilli not found by bacteriological examination, but tuberculosis confirmed histologically                                            |
|  | 01126 | Tuberculosis of lung with cavitation, tubercle bacilli not found by bacteriological or histological examination, but tuberculosis confirmed by other methods [inoculation of animals] |
|  | 01133 | Tuberculosis of bronchus, tubercle bacilli found (in sputum) by microscopy                                                                                                            |
|  | 01134 | Tuberculosis of bronchus, tubercle bacilli not found (in sputum) by microscopy, but found in bacterial culture                                                                        |
|  | 01135 | Tuberculosis of bronchus, tubercle bacilli not found by bacteriological examination, but tuberculosis confirmed histologically                                                        |
|  | 01136 | Tuberculosis of bronchus, tubercle bacilli not found by bacteriological or histological examination, but tuberculosis confirmed by other methods [inoculation of animals]             |
|  | 01140 | Tuberculous fibrosis of lung, unspecified                                                                                                                                             |
|  | 01142 | Tuberculous fibrosis of lung, bacteriological or histological examination unknown (at present)                                                                                        |
|  | 01143 | Tuberculous fibrosis of lung, tubercle bacilli found (in sputum) by microscopy                                                                                                        |
|  | 01150 | Tuberculous bronchiectasis, unspecified                                                                                                                                               |
|  | 01151 | Tuberculous bronchiectasis, bacteriological or histological examination not done                                                                                                      |
|  | 01153 | Tuberculous bronchiectasis, tubercle bacilli found (in sputum) by microscopy                                                                                                          |
|  | 01154 | Tuberculous bronchiectasis, tubercle bacilli not found (in sputum) by microscopy, but found by bacterial culture                                                                      |
|  | 01155 | Tuberculous bronchiectasis, tubercle bacilli not found by bacteriological examination, but tuberculosis confirmed histologically                                                      |
|  | 01160 | Tuberculous pneumonia [any form], unspecified                                                                                                                                         |
|  | 01162 | Tuberculous pneumonia [any form], bacteriological or histological examination unknown (at present)                                                                                    |
|  | 01163 | Tuberculous pneumonia [any form], tubercle bacilli found (in sputum) by microscopy                                                                                                    |
|  | 01164 | Tuberculous pneumonia [any form], tubercle bacilli not found (in sputum) by microscopy, but found by bacterial culture                                                                |

|  |       |                                                                                                                                                                                         |
|--|-------|-----------------------------------------------------------------------------------------------------------------------------------------------------------------------------------------|
|  | 01165 | Tuberculous pneumonia [any form], tubercle bacilli not found by bacteriological examination, but tuberculosis confirmed histologically                                                  |
|  | 01166 | Tuberculous pneumonia [any form], tubercle bacilli not found by bacteriological or histological examination, but tuberculosis confirmed by other methods [inoculation of animals]       |
|  | 01180 | Other specified pulmonary tuberculosis, unspecified                                                                                                                                     |
|  | 01182 | Other specified pulmonary tuberculosis, bacteriological or histological examination unknown (at present)                                                                                |
|  | 01183 | Other specified pulmonary tuberculosis, tubercle bacilli found (in sputum) by microscopy                                                                                                |
|  | 01184 | Other specified pulmonary tuberculosis, tubercle bacilli not found (in sputum) by microscopy, but found by bacterial culture                                                            |
|  | 01185 | Other specified pulmonary tuberculosis, tubercle bacilli not found by bacteriological examination, but tuberculosis confirmed histologically                                            |
|  | 01186 | Other specified pulmonary tuberculosis, tubercle bacilli not found by bacteriological or histological examination, but tuberculosis confirmed by other methods [inoculation of animals] |
|  | 01190 | Pulmonary tuberculosis, unspecified, unspecified                                                                                                                                        |
|  | 01191 | Pulmonary tuberculosis, unspecified, bacteriological or histological examination not done                                                                                               |
|  | 01192 | Pulmonary tuberculosis, unspecified, bacteriological or histological examination unknown (at present)                                                                                   |
|  | 01193 | Pulmonary tuberculosis, unspecified, tubercle bacilli found (in sputum) by microscopy                                                                                                   |
|  | 01194 | Pulmonary tuberculosis, unspecified, tubercle bacilli not found (in sputum) by microscopy, but found by bacterial culture                                                               |
|  | 01195 | Pulmonary tuberculosis, unspecified, tubercle bacilli not found by bacteriological examination, but tuberculosis confirmed histologically                                               |
|  | 01196 | Pulmonary tuberculosis, unspecified, tubercle bacilli not found by bacteriological or histological examination, but tuberculosis confirmed by other methods [inoculation of animals]    |
|  | 01200 | Tuberculous pleurisy, unspecified                                                                                                                                                       |

|                                       |       |                                                                                                                                                                       |
|---------------------------------------|-------|-----------------------------------------------------------------------------------------------------------------------------------------------------------------------|
|                                       | 01202 | Tuberculous pleurisy, bacteriological or histological examination unknown (at present)                                                                                |
|                                       | 01204 | Tuberculous pleurisy, tubercle bacilli not found (in sputum) by microscopy, but found by bacterial culture                                                            |
|                                       | 01206 | Tuberculous pleurisy, tubercle bacilli not found by bacteriological or histological examination, but tuberculosis confirmed by other methods [inoculation of animals] |
|                                       | 0212  | Pulmonary tularemia                                                                                                                                                   |
|                                       | 0221  | Pulmonary anthrax                                                                                                                                                     |
|                                       | 0310  | Pulmonary diseases due to other mycobacteria                                                                                                                          |
|                                       | 0391  | Pulmonary actinomycotic infection                                                                                                                                     |
|                                       | 0521  | Varicella (hemorrhagic) pneumonitis                                                                                                                                   |
|                                       | 0730  | Ornithosis with pneumonia                                                                                                                                             |
|                                       | 1124  | Candidiasis of lung                                                                                                                                                   |
|                                       | 1140  | Primary coccidioidomycosis (pulmonary)                                                                                                                                |
|                                       | 1144  | Chronic pulmonary coccidioidomycosis                                                                                                                                  |
|                                       | 1145  | Pulmonary coccidioidomycosis, unspecified                                                                                                                             |
|                                       | 11505 | Infection by Histoplasma capsulatum, pneumonia                                                                                                                        |
|                                       | 11595 | Histoplasmosis, unspecified, pneumonia                                                                                                                                |
|                                       | 1363  | Pneumocystosis                                                                                                                                                        |
|                                       | 27702 | Cystic fibrosis with pulmonary manifestations                                                                                                                         |
|                                       | 5070  | Pneumonitis due to inhalation of food or vomitus                                                                                                                      |
|                                       | 5071  | Pneumonitis due to inhalation of oils and essences                                                                                                                    |
|                                       | 5078  | Pneumonitis due to other solids and liquids                                                                                                                           |
|                                       | 5100  | Empyema with fistula                                                                                                                                                  |
|                                       | 5109  | Empyema without mention of fistula                                                                                                                                    |
|                                       | 5130  | Abscess of lung                                                                                                                                                       |
|                                       | 5131  | Abscess of mediastinum                                                                                                                                                |
|                                       | 5192  | Mediastinitis                                                                                                                                                         |
|                                       | 7955  | Nonspecific reaction to test for tuberculosis                                                                                                                         |
|                                       | V712  | Observation for suspected tuberculosis                                                                                                                                |
| Chronic Obstructive Pulmonary Disease | 4911  | Mucopurulent chronic bronchitis                                                                                                                                       |
|                                       | 49120 | Obstructive chronic bronchitis without exacerbation                                                                                                                   |
|                                       | 49121 | Obstructive chronic bronchitis with (acute) exacerbation                                                                                                              |
|                                       | 49122 | Obstructive chronic bronchitis with acute bronchitis                                                                                                                  |
|                                       | 4918  | Other chronic bronchitis                                                                                                                                              |
|                                       | 4919  | Unspecified chronic bronchitis                                                                                                                                        |
|                                       | 4920  | Emphysematous bleb                                                                                                                                                    |
|                                       | 4928  | Other emphysema                                                                                                                                                       |
|                                       | 49320 | Chronic obstructive asthma, unspecified                                                                                                                               |
|                                       | 49321 | Chronic obstructive asthma with status asthmaticus                                                                                                                    |

|            |       |                                                                        |
|------------|-------|------------------------------------------------------------------------|
|            | 49322 | Chronic obstructive asthma with (acute) exacerbation                   |
|            | 4940  | Bronchiectasis without acute exacerbation                              |
|            | 4941  | Bronchiectasis with acute exacerbation                                 |
|            | 496   | Chronic airway obstruction, not elsewhere classified                   |
|            | 5064  | Chronic respiratory conditions due to fumes and vapors                 |
|            | 5069  | Unspecified respiratory conditions due to fumes and vapors             |
|            | 74861 | Congenital bronchiectasis                                              |
| Arrhythmia | 4260  | Atrioventricular block, complete                                       |
|            | 42610 | Atrioventricular block, unspecified                                    |
|            | 42611 | First degree atrioventricular block                                    |
|            | 42612 | Mobitz (type) II atrioventricular block                                |
|            | 42613 | Other second degree atrioventricular block                             |
|            | 4262  | Left bundle branch hemiblock                                           |
|            | 4263  | Other left bundle branch block                                         |
|            | 4264  | Right bundle branch block                                              |
|            | 42650 | Bundle branch block, unspecified                                       |
|            | 42651 | Right bundle branch block and left posterior fascicular block          |
|            | 42652 | Right bundle branch block and left anterior fascicular block           |
|            | 42653 | Other bilateral bundle branch block                                    |
|            | 42654 | Trifascicular block                                                    |
|            | 4266  | Other heart block                                                      |
|            | 4267  | Anomalous atrioventricular excitation                                  |
|            | 42681 | Lown-Ganong-Levine syndrome                                            |
|            | 42682 | Long QT syndrome                                                       |
|            | 42689 | Other specified conduction disorders                                   |
|            | 4269  | Conduction disorder, unspecified                                       |
|            | 4270  | Paroxysmal supraventricular tachycardia                                |
|            | 4271  | Paroxysmal ventricular tachycardia                                     |
|            | 4272  | Paroxysmal tachycardia, unspecified                                    |
|            | 42731 | Atrial fibrillation                                                    |
|            | 42732 | Atrial flutter                                                         |
|            | 42741 | Ventricular fibrillation                                               |
|            | 42742 | Ventricular flutter                                                    |
|            | 42760 | Premature beats, unspecified                                           |
|            | 42761 | Supraventricular premature beats                                       |
|            | 42769 | Other premature beats                                                  |
|            | 42781 | Sinoatrial node dysfunction                                            |
|            | 42789 | Other specified cardiac dysrhythmias                                   |
|            | 4279  | Cardiac dysrhythmia, unspecified                                       |
|            | 7850  | Tachycardia, unspecified                                               |
|            | 7851  | Palpitations                                                           |
|            | 99601 | Mechanical complication due to cardiac pacemaker (electrode)           |
|            | 99604 | Mechanical complication of automatic implantable cardiac defibrillator |
| Chest Pain | 78650 | Chest pain, unspecified                                                |
|            | 78651 | Precordial pain                                                        |
|            | 78659 | Other chest pain                                                       |

|                        |       |                                                                                                         |
|------------------------|-------|---------------------------------------------------------------------------------------------------------|
|                        | V717  | Observation for suspected cardiovascular disease                                                        |
| Gastrointestinal Bleed | 4560  | Esophageal varices with bleeding                                                                        |
|                        | 5307  | Gastroesophageal laceration-hemorrhage syndrome                                                         |
|                        | 53082 | Esophageal hemorrhage                                                                                   |
|                        | 53100 | Acute gastric ulcer with hemorrhage, without mention of obstruction                                     |
|                        | 53101 | Acute gastric ulcer with hemorrhage, with obstruction                                                   |
|                        | 53120 | Acute gastric ulcer with hemorrhage and perforation, without mention of obstruction                     |
|                        | 53121 | Acute gastric ulcer with hemorrhage and perforation, with obstruction                                   |
|                        | 53140 | Chronic or unspecified gastric ulcer with hemorrhage, without mention of obstruction                    |
|                        | 53141 | Chronic or unspecified gastric ulcer with hemorrhage, with obstruction                                  |
|                        | 53160 | Chronic or unspecified gastric ulcer with hemorrhage and perforation, without mention of obstruction    |
|                        | 53161 | Chronic or unspecified gastric ulcer with hemorrhage and perforation, with obstruction                  |
|                        | 53200 | Acute duodenal ulcer with hemorrhage, without mention of obstruction                                    |
|                        | 53201 | Acute duodenal ulcer with hemorrhage, with obstruction                                                  |
|                        | 53220 | Acute duodenal ulcer with hemorrhage and perforation, without mention of obstruction                    |
|                        | 53221 | Acute duodenal ulcer with hemorrhage and perforation, with obstruction                                  |
|                        | 53240 | Chronic or unspecified duodenal ulcer with hemorrhage, without mention of obstruction                   |
|                        | 53241 | Chronic or unspecified duodenal ulcer with hemorrhage, with obstruction                                 |
|                        | 53260 | Chronic or unspecified duodenal ulcer with hemorrhage and perforation, without mention of obstruction   |
|                        | 53261 | Chronic or unspecified duodenal ulcer with hemorrhage and perforation, with obstruction                 |
|                        | 53300 | Acute peptic ulcer of unspecified site with hemorrhage, without mention of obstruction                  |
|                        | 53301 | Acute peptic ulcer of unspecified site with hemorrhage, with obstruction                                |
|                        | 53320 | Acute peptic ulcer of unspecified site with hemorrhage and perforation, without mention of obstruction  |
|                        | 53340 | Chronic or unspecified peptic ulcer of unspecified site with hemorrhage, without mention of obstruction |
|                        | 53341 | Chronic or unspecified peptic ulcer of unspecified site with hemorrhage, with obstruction               |

|                                     |       |                                                                                                                         |
|-------------------------------------|-------|-------------------------------------------------------------------------------------------------------------------------|
|                                     | 53360 | Chronic or unspecified peptic ulcer of unspecified site with hemorrhage and perforation, without mention of obstruction |
|                                     | 53400 | Acute gastrojejunal ulcer with hemorrhage, without mention of obstruction                                               |
|                                     | 53401 | Acute gastrojejunal ulcer, with hemorrhage, with obstruction                                                            |
|                                     | 53420 | Acute gastrojejunal ulcer with hemorrhage and perforation, without mention of obstruction                               |
|                                     | 53440 | Chronic or unspecified gastrojejunal ulcer with hemorrhage, without mention of obstruction                              |
|                                     | 53441 | Chronic or unspecified gastrojejunal ulcer, with hemorrhage, with obstruction                                           |
|                                     | 53460 | Chronic or unspecified gastrojejunal ulcer with hemorrhage and perforation, without mention of obstruction              |
|                                     | 53501 | Acute gastritis, with hemorrhage                                                                                        |
|                                     | 53511 | Atrophic gastritis, with hemorrhage                                                                                     |
|                                     | 53521 | Gastric mucosal hypertrophy, with hemorrhage                                                                            |
|                                     | 53531 | Alcoholic gastritis, with hemorrhage                                                                                    |
|                                     | 53541 | Other specified gastritis, with hemorrhage                                                                              |
|                                     | 53551 | Unspecified gastritis and gastroduodenitis, with hemorrhage                                                             |
|                                     | 53561 | Duodenitis, with hemorrhage                                                                                             |
|                                     | 53783 | Angiodysplasia of stomach and duodenum with hemorrhage                                                                  |
|                                     | 53784 | Dieulafoy lesion (hemorrhagic) of stomach and duodenum                                                                  |
|                                     | 56202 | Diverticulosis of small intestine with hemorrhage                                                                       |
|                                     | 56203 | Diverticulitis of small intestine with hemorrhage                                                                       |
|                                     | 56212 | Diverticulosis of colon with hemorrhage                                                                                 |
|                                     | 56213 | Diverticulitis of colon with hemorrhage                                                                                 |
|                                     | 5693  | Hemorrhage of rectum and anus                                                                                           |
|                                     | 56985 | Angiodysplasia of intestine with hemorrhage                                                                             |
|                                     | 5780  | Hematemesis                                                                                                             |
|                                     | 5781  | Blood in stool                                                                                                          |
|                                     | 5789  | Hemorrhage of gastrointestinal tract, unspecified                                                                       |
| Esophageal/Gastrointestinal Disease | 0030  | Salmonella gastroenteritis                                                                                              |
|                                     | 0040  | Shigella dysenteriae                                                                                                    |
|                                     | 0041  | Shigella flexneri                                                                                                       |
|                                     | 0042  | Shigella boydii                                                                                                         |
|                                     | 0043  | Shigella sonnei                                                                                                         |
|                                     | 0048  | Other specified shigella infections                                                                                     |
|                                     | 0049  | Shigellosis, unspecified                                                                                                |
|                                     | 0050  | Staphylococcal food poisoning                                                                                           |
|                                     | 0053  | Food poisoning due to other Clostridia                                                                                  |



|  |       |                                                                        |
|--|-------|------------------------------------------------------------------------|
|  | 0054  | Food poisoning due to <i>Vibrio parahaemolyticus</i>                   |
|  | 00581 | Food poisoning due to <i>Vibrio vulnificus</i>                         |
|  | 00589 | Other bacterial food poisoning                                         |
|  | 0059  | Food poisoning, unspecified                                            |
|  | 0060  | Acute amebic dysentery without mention of abscess                      |
|  | 0061  | Chronic intestinal amebiasis without mention of abscess                |
|  | 0062  | Amebic nondysenteric colitis                                           |
|  | 0071  | Giardiasis                                                             |
|  | 0074  | Cryptosporidiosis                                                      |
|  | 0078  | Other specified protozoal intestinal diseases                          |
|  | 00800 | Intestinal infection due to <i>E. coli</i> , unspecified               |
|  | 00801 | Intestinal infection due to enteropathogenic <i>E. coli</i>            |
|  | 00802 | Intestinal infection due to enterotoxigenic <i>E. coli</i>             |
|  | 00804 | Intestinal infection due to enterohemorrhagic <i>E. coli</i>           |
|  | 00809 | Intestinal infection due to other intestinal <i>E. coli</i> infections |
|  | 0082  | Intestinal infection due to <i>aerobacter aerogenes</i>                |
|  | 0083  | Intestinal infection due to <i>proteus (mirabilis) (morganii)</i>      |
|  | 00841 | Intestinal infection due to <i>staphylococcus</i>                      |
|  | 00842 | Intestinal infection due to <i>pseudomonas</i>                         |
|  | 00843 | Intestinal infection due to <i>campylobacter</i>                       |
|  | 00844 | Intestinal infection due to <i>yersinia enterocolitica</i>             |
|  | 00845 | Intestinal infection due to <i>Clostridium difficile</i>               |
|  | 00846 | Intestinal infection due to other anaerobes                            |
|  | 00847 | Intestinal infection due to other gram-negative bacteria               |
|  | 00849 | Intestinal infection due to other organisms                            |
|  | 0085  | Bacterial enteritis, unspecified                                       |
|  | 00861 | Enteritis due to rotavirus                                             |
|  | 00862 | Enteritis due to adenovirus                                            |
|  | 00863 | Enteritis due to norwalk virus                                         |
|  | 00867 | Enteritis due to enterovirus nec                                       |
|  | 00869 | Enteritis due to other viral enteritis                                 |
|  | 0088  | Intestinal infection due to other organism, not elsewhere classified   |
|  | 0090  | Infectious colitis, enteritis, and gastroenteritis                     |
|  | 0091  | Colitis, enteritis, and gastroenteritis of presumed infectious origin  |
|  | 0092  | Infectious diarrhea                                                    |
|  | 0093  | Diarrhea of presumed infectious origin                                 |
|  | 11284 | Candidal esophagitis                                                   |
|  | 11285 | Candidal enteritis                                                     |

|  |       |                                                                           |
|--|-------|---------------------------------------------------------------------------|
|  | 1231  | Cysticercosis                                                             |
|  | 1269  | Ancylostomiasis and necatoriasis, unspecified                             |
|  | 1271  | Anisakiasis                                                               |
|  | 1272  | Strongyloidiasis                                                          |
|  | 1273  | Trichuriasis                                                              |
|  | 1279  | Intestinal helminthiasis, unspecified                                     |
|  | 129   | Intestinal parasitism, unspecified                                        |
|  | 22804 | Hemangioma of intra-abdominal structures                                  |
|  | 2712  | Hereditary fructose intolerance                                           |
|  | 2713  | Intestinal disaccharidase deficiencies and disaccharide malabsorption     |
|  | 3064  | Gastrointestinal malfunction arising from mental factors                  |
|  | 4474  | Celiac artery compression syndrome                                        |
|  | 5300  | Achalasia and cardiospasm                                                 |
|  | 53010 | Esophagitis, unspecified                                                  |
|  | 53011 | Reflux esophagitis                                                        |
|  | 53012 | Acute esophagitis                                                         |
|  | 53019 | Other esophagitis                                                         |
|  | 5303  | Stricture and stenosis of esophagus                                       |
|  | 5304  | Perforation of esophagus                                                  |
|  | 5305  | Dyskinesia of esophagus                                                   |
|  | 5306  | Diverticulum of esophagus, acquired                                       |
|  | 53081 | Esophageal reflux                                                         |
|  | 53083 | Esophageal leukoplakia                                                    |
|  | 53084 | Tracheoesophageal fistula                                                 |
|  | 53089 | Other specified disorders of esophagus                                    |
|  | 5309  | Unspecified disorder of esophagus                                         |
|  | 53500 | Acute gastritis, without mention of hemorrhage                            |
|  | 53510 | Atrophic gastritis, without mention of hemorrhage                         |
|  | 53520 | Gastric mucosal hypertrophy, without mention of hemorrhage                |
|  | 53530 | Alcoholic gastritis, without mention of hemorrhage                        |
|  | 53540 | Other specified gastritis, without mention of hemorrhage                  |
|  | 53550 | Unspecified gastritis and gastroduodenitis, without mention of hemorrhage |
|  | 53560 | Duodenitis, without mention of hemorrhage                                 |
|  | 5360  | Achlorhydria                                                              |
|  | 5361  | Acute dilatation of stomach                                               |
|  | 5362  | Persistent vomiting                                                       |
|  | 5363  | Gastroparesis                                                             |
|  | 5368  | Dyspepsia and other specified disorders of function of stomach            |
|  | 5369  | Unspecified functional disorder of stomach                                |
|  | 5371  | Gastric diverticulum                                                      |
|  | 5372  | Chronic duodenal ileus                                                    |
|  | 5374  | Fistula of stomach or duodenum                                            |
|  | 5375  | Gastroptosis                                                              |
|  | 5376  | Hourglass stricture or stenosis of stomach                                |

|  |       |                                                                      |
|--|-------|----------------------------------------------------------------------|
|  | 53781 | Pylorospasm                                                          |
|  | 53782 | Angiodysplasia of stomach and duodenum without mention of hemorrhage |
|  | 53789 | Other specified disorders of stomach and duodenum                    |
|  | 5379  | Unspecified disorder of stomach and duodenum                         |
|  | 5523  | Diaphragmatic hernia with obstruction                                |
|  | 5533  | Diaphragmatic hernia without mention of obstruction or gangrene      |
|  | 5583  | Allergic gastroenteritis and colitis                                 |
|  | 5589  | Other and unspecified noninfectious gastroenteritis and colitis      |
|  | 56200 | Diverticulosis of small intestine (without mention of hemorrhage)    |
|  | 56201 | Diverticulitis of small intestine (without mention of hemorrhage)    |
|  | 56210 | Diverticulosis of colon (without mention of hemorrhage)              |
|  | 56211 | Diverticulitis of colon (without mention of hemorrhage)              |
|  | 56400 | Constipation, unspecified                                            |
|  | 56401 | Slow transit constipation                                            |
|  | 56402 | Outlet dysfunction constipation                                      |
|  | 56409 | Other constipation                                                   |
|  | 5641  | Irritable bowel syndrome                                             |
|  | 5642  | Postgastric surgery syndromes                                        |
|  | 5643  | Vomiting following gastrointestinal surgery                          |
|  | 5644  | Other postoperative functional disorders                             |
|  | 5645  | Functional diarrhea                                                  |
|  | 5646  | Anal spasm                                                           |
|  | 56481 | Neurogenic bowel                                                     |
|  | 56489 | Other functional disorders of intestine                              |
|  | 5649  | Unspecified functional disorder of intestine                         |
|  | 5790  | Celiac disease                                                       |
|  | 5791  | Tropical sprue                                                       |
|  | 5792  | Blind loop syndrome                                                  |
|  | 5793  | Other and unspecified postsurgical nonabsorption                     |
|  | 5794  | Pancreatic steatorrhea                                               |
|  | 5798  | Other specified intestinal malabsorption                             |
|  | 5799  | Unspecified intestinal malabsorption                                 |
|  | 78701 | Nausea with vomiting                                                 |
|  | 78702 | Nausea alone                                                         |
|  | 78703 | Vomiting alone                                                       |
|  | 7871  | Heartburn                                                            |
|  | 7872  | Dysphagia                                                            |
|  | 7873  | Flatulence, eructation, and gas pain                                 |
|  | 7874  | Visible peristalsis                                                  |
|  | 7876  | Incontinence of feces                                                |
|  | 7877  | Abnormal feces                                                       |
|  | 78791 | Diarrhea                                                             |
|  | 78799 | Other symptoms involving digestive system                            |
|  | 78900 | Abdominal pain, unspecified site                                     |

|                          |       |                                                                                                                    |
|--------------------------|-------|--------------------------------------------------------------------------------------------------------------------|
|                          | 78901 | Abdominal pain, right upper quadrant                                                                               |
|                          | 78902 | Abdominal pain, left upper quadrant                                                                                |
|                          | 78903 | Abdominal pain, right lower quadrant                                                                               |
|                          | 78904 | Abdominal pain, left lower quadrant                                                                                |
|                          | 78905 | Abdominal pain, periumbilic                                                                                        |
|                          | 78906 | Abdominal pain, epigastric                                                                                         |
|                          | 78907 | Abdominal pain, generalized                                                                                        |
|                          | 78909 | Abdominal pain, other specified site                                                                               |
|                          | 78930 | Abdominal or pelvic swelling, mass, or lump, unspecified site                                                      |
|                          | 78931 | Abdominal or pelvic swelling, mass, or lump, right upper quadrant                                                  |
|                          | 78932 | Abdominal or pelvic swelling, mass, or lump, left upper quadrant                                                   |
|                          | 78933 | Abdominal or pelvic swelling, mass, or lump, right lower quadrant                                                  |
|                          | 78934 | Abdominal or pelvic swelling, mass, or lump, left lower quadrant                                                   |
|                          | 78935 | Abdominal or pelvic swelling, mass, or lump, periumbilic                                                           |
|                          | 78936 | Abdominal or pelvic swelling, mass, or lump, epigastric                                                            |
|                          | 78937 | Abdominal or pelvic swelling, mass, or lump, generalized                                                           |
|                          | 78939 | Abdominal or pelvic swelling, mass, or lump, other specified site                                                  |
|                          | 78960 | Abdominal tenderness, unspecified site                                                                             |
|                          | 78961 | Abdominal tenderness, right upper quadrant                                                                         |
|                          | 78962 | Abdominal tenderness, left upper quadrant                                                                          |
|                          | 78964 | Abdominal tenderness, left lower quadrant                                                                          |
|                          | 78966 | Abdominal tenderness, epigastric                                                                                   |
|                          | 78967 | Abdominal tenderness, generalized                                                                                  |
|                          | 78969 | Abdominal tenderness, other specified site                                                                         |
|                          | 7899  | Other symptoms involving abdomen and pelvis                                                                        |
|                          | 7921  | Nonspecific abnormal findings in stool contents                                                                    |
|                          | 7934  | Nonspecific (abnormal) findings on radiological and other examination of gastrointestinal tract                    |
|                          | 7936  | Nonspecific (abnormal) findings on radiological and other examination of abdominal area, including retroperitoneum |
| Hip Fracture/Dislocation | 82000 | Closed fracture of intracapsular section of neck of femur, unspecified                                             |
|                          | 82001 | Closed fracture of epiphysis (separation) (upper) of neck of femur                                                 |
|                          | 82002 | Closed fracture of midcervical section of neck of femur                                                            |
|                          | 82003 | Closed fracture of base of neck of femur                                                                           |
|                          | 82009 | Other closed transcervical fracture of neck of femur                                                               |
|                          | 82010 | Open fracture of intracapsular section of neck of femur, unspecified                                               |

|                   |       |                                                                     |
|-------------------|-------|---------------------------------------------------------------------|
|                   | 82011 | Open fracture of epiphysis (separation) (upper) of neck of femur    |
|                   | 82012 | Open fracture of midcervical section of neck of femur               |
|                   | 82013 | Open fracture of base of neck of femur                              |
|                   | 82019 | Other open transcervical fracture of neck of femur                  |
|                   | 82020 | Closed fracture of trochanteric section of neck of femur            |
|                   | 82021 | Closed fracture of intertrochanteric section of neck of femur       |
|                   | 82022 | Closed fracture of subtrochanteric section of neck of femur         |
|                   | 82030 | Open fracture of trochanteric section of neck of femur, unspecified |
|                   | 82031 | Open fracture of intertrochanteric section of neck of femur         |
|                   | 82032 | Open fracture of subtrochanteric section of neck of femur           |
|                   | 8208  | Closed fracture of unspecified part of neck of femur                |
|                   | 8209  | Open fracture of unspecified part of neck of femur                  |
| Metabolic Disease | 2510  | Hypoglycemic coma                                                   |
|                   | 2512  | Hypoglycemia, unspecified                                           |
|                   | 2513  | Postsurgical hypoinsulinemia                                        |
|                   | 260   | Kwashiorkor                                                         |
|                   | 261   | Nutritional marasmus                                                |
|                   | 262   | Other severe protein-calorie malnutrition                           |
|                   | 2630  | Malnutrition of moderate degree                                     |
|                   | 2631  | Malnutrition of mild degree                                         |
|                   | 2638  | Other protein-calorie malnutrition                                  |
|                   | 2639  | Unspecified protein-calorie malnutrition                            |
|                   | 2651  | Other and unspecified manifestations of thiamine deficiency         |
|                   | 2661  | Vitamin B6 deficiency                                               |
|                   | 2662  | Other B-complex deficiencies                                        |
|                   | 2669  | Unspecified vitamin B deficiency                                    |
|                   | 267   | Ascorbic acid deficiency                                            |
|                   | 2689  | Unspecified vitamin D deficiency                                    |
|                   | 2690  | Deficiency of vitamin K                                             |
|                   | 2691  | Deficiency of other vitamins                                        |
|                   | 2692  | Unspecified vitamin deficiency                                      |
|                   | 2693  | Mineral deficiency, not elsewhere classified                        |
|                   | 2698  | Other nutritional deficiency                                        |
|                   | 2699  | Unspecified nutritional deficiency                                  |
|                   | 2752  | Disorders of magnesium metabolism                                   |
|                   | 27540 | Unspecified disorder of calcium metabolism                          |
|                   | 27541 | Hypocalcemia                                                        |
|                   | 27542 | Hypercalcemia                                                       |
|                   | 27549 | Other disorders of calcium metabolism                               |
|                   | 2760  | Hyperosmolality and/or hyponatremia                                 |
|                   | 2761  | Hyposmolality and/or hyponatremia                                   |
|                   | 2762  | Acidosis                                                            |

|               |       |                                                                                                                                                    |
|---------------|-------|----------------------------------------------------------------------------------------------------------------------------------------------------|
|               | 2763  | Alkalosis                                                                                                                                          |
|               | 2764  | Mixed acid-base balance disorder                                                                                                                   |
|               | 2765  | Volume depletion disorder                                                                                                                          |
|               | 27650 | Volume depletion, unspecified                                                                                                                      |
|               | 27651 | Dehydration                                                                                                                                        |
|               | 27652 | Hypovolemia                                                                                                                                        |
|               | 2766  | Fluid overload disorder                                                                                                                            |
|               | 2767  | Hyperpotassemia                                                                                                                                    |
|               | 2768  | Hypopotassemia                                                                                                                                     |
|               | 2769  | Electrolyte and fluid disorders not elsewhere classified                                                                                           |
|               | 27700 | Electrolyte and fluid disorders not elsewhere classified                                                                                           |
|               | 27800 | Obesity, unspecified                                                                                                                               |
|               | 27801 | Morbid obesity                                                                                                                                     |
|               | 27802 | Overweight                                                                                                                                         |
|               | 2781  | Localized adiposity                                                                                                                                |
|               | 2783  | Hypercarotinemias                                                                                                                                  |
|               | 2784  | Hypervitaminosis D                                                                                                                                 |
|               | 2788  | Other hyperalimentation                                                                                                                            |
|               | 7817  | Tetany                                                                                                                                             |
|               | 7830  | Anorexia                                                                                                                                           |
|               | 7831  | Abnormal weight gain                                                                                                                               |
|               | 78321 | Loss of weight                                                                                                                                     |
|               | 78322 | Underweight                                                                                                                                        |
|               | 7833  | Feeding difficulties and mismanagement                                                                                                             |
|               | 78340 | Lack of normal physiological development, unspecified                                                                                              |
|               | 78341 | Failure to thrive                                                                                                                                  |
|               | 7835  | Polydipsia                                                                                                                                         |
|               | 7836  | Polyphagia                                                                                                                                         |
|               | 7837  | Adult failure to thrive                                                                                                                            |
|               | 7839  | Other symptoms concerning nutrition, metabolism, and development                                                                                   |
|               | 79021 | Impaired fasting glucose                                                                                                                           |
|               | 79029 | Other abnormal glucose                                                                                                                             |
| Renal Failure | 40301 | Hypertensive chronic kidney disease, malignant, with chronic kidney disease stage V or End Stage Renal Disease                                     |
|               | 40311 | Hypertensive chronic kidney disease, benign, with chronic kidney disease stage V or end stage renal disease                                        |
|               | 40391 | Hypertensive chronic kidney disease, unspecified, with chronic kidney disease stage V or end stage renal disease                                   |
|               | 40402 | Hypertensive heart and chronic kidney disease, malignant, without heart failure and with chronic kidney disease stage V or end stage renal disease |
|               | 40412 | Hypertensive heart and chronic kidney disease, benign, without heart failure and with chronic kidney disease stage V or end stage renal disease    |

|                         |       |                                                                                                                                                      |
|-------------------------|-------|------------------------------------------------------------------------------------------------------------------------------------------------------|
|                         | 40492 | Hypertensive heart and chronic kidney disease, unspecified, without heart failure and with chronic kidney disease stage V or end stage renal disease |
|                         | 5845  | Acute kidney failure with lesion of tubular necrosis                                                                                                 |
|                         | 5846  | Acute kidney failure with lesion of renal cortical necrosis                                                                                          |
|                         | 5847  | Acute kidney failure with lesion of renal medullary [papillary] necrosis                                                                             |
|                         | 5848  | Acute kidney failure with other specified pathological lesion in kidney                                                                              |
|                         | 5849  | Acute kidney failure, unspecified                                                                                                                    |
|                         | 585   | Chronic kidney disease (ckd)                                                                                                                         |
|                         | 5851  | Chronic kidney disease, Stage I                                                                                                                      |
|                         | 5852  | Chronic kidney disease, Stage II (mild)                                                                                                              |
|                         | 5853  | Chronic kidney disease, Stage III (moderate)                                                                                                         |
|                         | 5854  | Chronic kidney disease, Stage IV (severe)                                                                                                            |
|                         | 5855  | Chronic kidney disease, Stage V                                                                                                                      |
|                         | 5856  | End stage renal disease                                                                                                                              |
|                         | 5859  | Chronic kidney disease, unspecified                                                                                                                  |
|                         | 586   | Renal failure, unspecified                                                                                                                           |
|                         | 7885  | Oliguria and anuria                                                                                                                                  |
|                         | 9585  | Traumatic anuria                                                                                                                                     |
| Urinary Tract Infection | 01600 | Tuberculosis of kidney, unspecified                                                                                                                  |
|                         | 01634 | Tuberculosis of other urinary organs, tubercle bacilli not found (in sputum) by microscopy, but found by bacterial culture                           |
|                         | 03284 | Diphtheritic cystitis                                                                                                                                |
|                         | 1200  | Schistosomiasis due to schistosoma haematobium                                                                                                       |
|                         | 59000 | Chronic pyelonephritis without lesion of renal medullary necrosis                                                                                    |
|                         | 59010 | Acute pyelonephritis without lesion of renal medullary necrosis                                                                                      |
|                         | 59011 | Acute pyelonephritis with lesion of renal medullary necrosis                                                                                         |
|                         | 5902  | Renal and perinephric abscess                                                                                                                        |
|                         | 5903  | Pyeloureteritis cystica                                                                                                                              |
|                         | 59080 | Pyelonephritis, unspecified                                                                                                                          |
|                         | 5909  | Infection of kidney, unspecified                                                                                                                     |
|                         | 5933  | Stricture or kinking of ureter                                                                                                                       |
|                         | 5950  | Acute cystitis                                                                                                                                       |
|                         | 5951  | Chronic interstitial cystitis                                                                                                                        |
|                         | 5952  | Other chronic cystitis                                                                                                                               |
|                         | 5953  | Trigonitis                                                                                                                                           |
|                         | 59581 | Cystitis cystica                                                                                                                                     |
|                         | 59589 | Other specified types of cystitis                                                                                                                    |
|                         | 5959  | Cystitis, unspecified                                                                                                                                |
|                         | 5970  | Urethral abscess                                                                                                                                     |
|                         | 59780 | Urethritis, unspecified                                                                                                                              |
|                         | 59781 | Urethral syndrome NOS                                                                                                                                |
|                         | 59789 | Other urethritis                                                                                                                                     |

|        |       |                                                                                                      |
|--------|-------|------------------------------------------------------------------------------------------------------|
|        | 5990  | Urinary tract infection, site not specified                                                          |
| Sepsis | 0031  | Salmonella septicemia                                                                                |
|        | 0362  | Meningococemia                                                                                       |
|        | 0363  | Waterhouse-Friderichsen syndrome, meningococcal                                                      |
|        | 03689 | Other specified meningococcal infections                                                             |
|        | 0369  | Meningococcal infection, unspecified                                                                 |
|        | 0380  | Streptococcal septicemia                                                                             |
|        | 03810 | Staphylococcal septicemia, unspecified                                                               |
|        | 03811 | Methicillin susceptible Staphylococcus aureus septicemia                                             |
|        | 03819 | Other staphylococcal septicemia                                                                      |
|        | 0382  | Pneumococcal septicemia [Streptococcus pneumoniae septicemia]                                        |
|        | 0383  | Septicemia due to anaerobes                                                                          |
|        | 03840 | Septicemia due to gram-negative organism, unspecified                                                |
|        | 03841 | Septicemia due to hemophilus influenzae [H. influenzae]                                              |
|        | 03842 | Septicemia due to escherichia coli [E. coli]                                                         |
|        | 03843 | Septicemia due to pseudomonas                                                                        |
|        | 03844 | Septicemia due to serratia                                                                           |
|        | 03849 | Other septicemia due to gram-negative organisms                                                      |
|        | 0388  | Other specified septicemias                                                                          |
|        | 0389  | Unspecified septicemia                                                                               |
|        | 0545  | Herpetic septicemia                                                                                  |
|        | 78552 | Septic shock                                                                                         |
|        | 78559 | Other shock without mention of trauma                                                                |
|        | 7907  | Bacteremia                                                                                           |
|        | 99590 | Systemic inflammatory response syndrome, unspecified                                                 |
|        | 99591 | Sepsis                                                                                               |
|        | 99592 | Severe sepsis                                                                                        |
|        | 99593 | Systemic inflammatory response syndrome due to noninfectious process without acute organ dysfunction |
|        | 99594 | Systemic inflammatory response syndrome due to noninfectious process with acute organ dysfunction    |
