# Supplementary material
Source: PubMed Central journal article supplement (PMC11128274)
Supplement: NIHMS1989549-supplement-Appendix_B.pdf [file NIHMS1989549-supplement-Appendix_B.pdf]

**Appendix B. Length of Stay at Transferring and Accepting Hospital Among Transferred Patients**

| Disease Category                      | Length of Stay, Days (SD) |                    |
|---------------------------------------|---------------------------|--------------------|
|                                       | Transferring Hospital     | Accepting Hospital |
| Acute Myocardial Infarction           | 2.06(2.67)                | 6.40(6.40)         |
| Respiratory Disease                   | 5.68(6.12)                | 9.65(7.50)         |
| Sepsis                                | 4.79(5.56)                | 9.86(8.91)         |
| Stroke                                | 2.75(3.76)                | 8.07(7.49)         |
| Arrhythmia                            | 2.63(2.93)                | 5.36(5.98)         |
| Renal Failure                         | 3.95(4.23)                | 8.54(7.28)         |
| Congestive Heart Failure              | 3.92(4.02)                | 8.61(8.38)         |
| Metabolic Disease                     | 3.46(3.76)                | 8.22(7.81)         |
| Gastrointestinal Bleed                | 3.37(3.95)                | 7.20(7.16)         |
| Pneumonia                             | 4.46(4.38)                | 8.43(7.09)         |
| Hip Fracture/Dislocation              | 2.37(3.18)                | 6.94(5.19)         |
| Chronic Obstructive Pulmonary Disease | 4.14(4.03)                | 7.15(6.98)         |
| Urinary Tract Infection               | 3.81(3.93)                | 7.22(5.96)         |
| Esophageal/Gastrointestinal Disease   | 3.99(4.75)                | 8.48(8.20)         |
| Chest Pain                            | 1.46(1.68)                | 3.84(4.10)         |
