# Supplementary material
Source: PubMed Central journal article supplement (PMC11128274)
Supplement: NIHMS1989549-supplement-Appendix_C.pdf [file NIHMS1989549-supplement-Appendix_C.pdf]

## Appendix C. Association of Inter-Hospital Transfer on Unadjusted Compared to Propensity-Matched Odds of 3-Day and 30-Day Mortality

### A. 3-Day Mortality

| Disease Category                      | Unadjusted OR (95% CI) | Propensity-Matched OR (95% CI) | <sup>†</sup> Direction Towards Null |
|---------------------------------------|------------------------|--------------------------------|-------------------------------------|
| Acute Myocardial Infarction           | 0.28(0.24,0.32)        | <b>0.32(0.28,0.36)</b>         | Closer                              |
| Respiratory Disease                   | 0.33(0.22,0.52)        | <b>0.33(0.21,0.51)</b>         | ~                                   |
| Sepsis                                | 0.40(0.35,0.45)        | <b>0.40(0.35,0.46)</b>         | ~                                   |
| Stroke                                | 0.49(0.39,0.60)        | <b>0.50(0.40,0.63)</b>         | Closer                              |
| Arrhythmia                            | 0.69(0.51,0.92)        | 0.75(0.55,1.00)                | Closer                              |
| Renal Failure                         | 0.81(0.61,1.08)        | 0.80(0.60,1.07)                | Further                             |
| Congestive Heart Failure              | 0.79(0.65,0.96)        | 0.84(0.69,1.03)                | Closer                              |
| Metabolic Disease                     | 0.87(0.51,1.46)        | 0.86(0.51,1.43)                | Further                             |
| Gastrointestinal Bleed                | 0.96(0.70,1.32)        | 0.90(0.65,1.23)                | Further                             |
| Pneumonia                             | 1.09(0.87,1.37)        | 1.03(0.82,1.30)                | Closer                              |
| Hip Fracture/Dislocation              | 1.03(0.65,1.62)        | 1.12(0.69,1.84)                | Further                             |
| Chronic Obstructive Pulmonary Disease | 1.59(1.02,2.50)        | 1.40(0.88,2.22)                | Closer                              |
| Urinary Tract Infection               | 1.63(0.78,3.42)        | 1.54(0.73,3.22)                | Closer                              |
| Esophageal/Gastrointestinal Disease   | 2.62(1.54,4.44)        | <b>2.33(1.36,3.97)</b>         | Closer                              |
| Chest Pain                            | 3.01(0.61,15.00)       | 3.01(0.60,15.12)               | ~                                   |

### B. 30-Day Mortality

| Disease Category                      | Unadjusted OR (95% CI) | Propensity-Matched OR (95% CI) | <sup>†</sup> Direction Towards Null |
|---------------------------------------|------------------------|--------------------------------|-------------------------------------|
| Acute Myocardial Infarction           | 0.42(0.38,0.46)        | <b>0.52(0.48,0.57)</b>         | Closer                              |
| Respiratory Disease                   | 0.80(0.64,1.00)        | 0.82(0.65,1.04)                | Closer                              |
| Sepsis                                | 0.86(0.80,0.94)        | 0.88(0.81,0.95)                | Closer                              |
| Stroke                                | 0.87(0.76,1.00)        | 0.91(0.79,1.05)                | Closer                              |
| Arrhythmia                            | 0.88(0.77,1.01)        | 1.01(0.87,1.17)                | Closer                              |
| Renal Failure                         | 1.72(1.47,2.02)        | <b>1.80(1.53,2.11)</b>         | Further                             |
| Congestive Heart Failure              | 1.37(1.24,1.51)        | <b>1.47(1.33,1.62)</b>         | Further                             |
| Metabolic Disease                     | 1.79(1.34,2.30)        | <b>1.79(1.36,2.35)</b>         | ~                                   |
| Gastrointestinal Bleed                | 1.19(1.00,1.41)        | 1.20(1.00,1.43)                | Further                             |
| Pneumonia                             | 2.00(1.76,2.27)        | <b>1.88(1.66,2.14)</b>         | Closer                              |
| Hip Fracture/Dislocation              | 1.28(1.02,1.61)        | <b>1.60(1.18,2.18)</b>         | Further                             |
| Chronic Obstructive Pulmonary Disease | 2.41(1.91,3.05)        | <b>2.04(1.61,2.60)</b>         | Closer                              |
| Urinary Tract Infection               | 2.57(1.83,3.61)        | <b>2.56(1.81,3.61)</b>         | Closer                              |
| Esophageal/Gastrointestinal Disease   | 2.96(2.32,3.79)        | <b>2.81(2.17,3.65)</b>         | Closer                              |
| Chest Pain                            | 1.44(0.85,2.46)        | 1.74(0.98,3.10)                | Further                             |

OR=Odds Ratio; CI=Confidence Interval

<sup>†</sup>Indicates whether OR gets closer or further from null (1.0) when go from unadjusted to adjusted

Bold-faced indicates the statistically significant propensity-matched ORs.
